# Supplementary material for: Characterization of Neoantigen Load Subgroups in Gynecologic and Breast Cancers
Source: Front Bioeng Biotechnol. 2020 Jul 13;8:702. doi: 10.3389/fbioe.2020.00702 (PMC7370692; doi:10.3389/fbioe.2020.00702)
Supplement: TABLE S2 — Gene Ontology annotation results of significantly dysregulate genes among identified subgroups. [file Table_2.XLSX]

## Sheet: Sheet1
Table S2. (Related to Figure 1) Table showing Gene Ontology annotation results of significantly dysregulate genes among identified subgroups
Category	ID	Description	BgRatio	pvalue	p.adjust	qvalue	geneID	Count
Biological Process (BP)	GO:0006959	humoral immune response	349/18493	6.66473e-06	0.00114633	0.000238527	CXCL9/CXCL13/IGLL5	3
	GO:0061844	antimicrobial humoral immune response mediated by antimicrobial peptide	71/18493	4.34915e-05	0.00238392	0.000496043	CXCL9/CXCL13	2
	GO:0070098	chemokine-mediated signaling pathway	87/18493	6.54357e-05	0.00238392	0.000496043	CXCL9/CXCL13	2
	GO:1990868	response to chemokine	95/18493	7.80769e-05	0.00238392	0.000496043	CXCL9/CXCL13	2
	GO:1990869	cellular response to chemokine	95/18493	7.80769e-05	0.00238392	0.000496043	CXCL9/CXCL13	2
	GO:0030593	neutrophil chemotaxis	101/18493	8.82873e-05	0.00238392	0.000496043	CXCL9/CXCL13	2
	GO:1990266	neutrophil migration	112/18493	0.000108629	0.00238392	0.000496043	CXCL9/CXCL13	2
	GO:0019730	antimicrobial humoral response	118/18493	0.000120608	0.00238392	0.000496043	CXCL9/CXCL13	2
	GO:0071621	granulocyte chemotaxis	120/18493	0.00012474	0.00238392	0.000496043	CXCL9/CXCL13	2
	GO:0071222	cellular response to lipopolysaccharide	199/18493	0.000343204	0.00486553	0.00101241	CXCL9/CXCL13	2
	GO:0071219	cellular response to molecule of bacterial origin	206/18493	0.000367744	0.00486553	0.00101241	CXCL9/CXCL13	2
	GO:0071216	cellular response to biotic stimulus	229/18493	0.000454288	0.00520917	0.00108392	CXCL9/CXCL13	2
	GO:0007204	positive regulation of cytosolic calcium ion concentration	309/18493	0.000825668	0.0082145	0.00170926	CXCL9/CXCL13	2
	GO:0042742	defense response to bacterium	319/18493	0.000879743	0.0082145	0.00170926	CXCL13/IGLL5	2
	GO:0002460	adaptive immune response based on somatic recombination of immune receptors built from immunoglobulin superfamily domains	354/18493	0.00108233	0.00846188	0.00176073	CXCL13/IGLL5	2
Molecular Function (MF)	GO:0045236	CXCR chemokine receptor binding	11/17632	1.06118e-06	1.59176e-05	NA	CXCL9/CXCL13	2
	GO:0048018	receptor ligand activity	478/17632	0.00216073	0.00463014	NA	CXCL9/CXCL13	2
	GO:0017134	fibroblast growth factor binding	23/17632	0.00390846	0.00732836	NA	CXCL13	1
Cellular Component (CC)	GO:0009897	external side of plasma membrane	359/19659	0.000985616	0.00295685	NA	CXCL9/IGLL5	2
