# Supplementary material for: Characterization of Neoantigen Load Subgroups in Gynecologic and Breast Cancers
Source: Front Bioeng Biotechnol. 2020 Jul 13;8:702. doi: 10.3389/fbioe.2020.00702 (PMC7370692; doi:10.3389/fbioe.2020.00702)
Supplement: TABLE S3 — Thirty-seven genes highly related with AC092580.4. [file Table_3.XLSX]

## Sheet: Sheet1
Table S3. (Related to Figure 1) Table showing 37 genes highly related with AC092580.4
Gene	Correlation Coefficient
CCL5	0.817186
GZMH	0.811746
GZMA	0.800778
PRF1	0.800206
NKG7	0.799171
GZMB	0.780086
IFNG	0.779567
CXCR6	0.778765
CD3D	0.778667
SIRPG	0.77384
SLA2	0.765295
CD8A	0.75544
CTSW	0.754753
ZNF683	0.754222
IL18RAP	0.753475
CD2	0.749977
CD7	0.747891
CD247	0.747509
CD244	0.742881
TBX21	0.742029
CD3E	0.737727
LCK	0.735621
PDCD1	0.729195
FASLG	0.724906
PTPN7	0.722543
IL2RG	0.722278
ARHGAP9	0.721723
CD96	0.718231
IL12RB1	0.716641
UBASH3A	0.712271
GNLY	0.709198
CD8B	0.70789
TIGIT	0.707522
SIT1	0.706072
CST7	0.70569
APOBEC3G	0.703111
SP140	0.701432
