# Supplementary material for: Characterization of Neoantigen Load Subgroups in Gynecologic and Breast Cancers
Source: Front Bioeng Biotechnol. 2020 Jul 13;8:702. doi: 10.3389/fbioe.2020.00702 (PMC7370692; doi:10.3389/fbioe.2020.00702)
Supplement: TABLE S4 — GSEA results for 37 genes highly related with AC092580.4. [file Table_4.XLSX]

## Sheet: Sheet1
Table S4. (Related to Figure 1) Table showing GSEA results for 37 genes highly related with AC092580.4
ID	Description	setSize	enrichmentScore	NES	pvalue	p.adjust	qvalues	rank	leading_edge	core_enrichment
DEURIG_T_CELL_PROLYMPHOCYTIC_LEUKEMIA_DN	DEURIG_T_CELL_PROLYMPHOCYTIC_LEUKEMIA_DN	15	0.559077	2.03741	0.00694444	0.214204	0.184482	20	tags=87%, list=54%, signal=67%	CCL5/GZMH/GZMA/PRF1/NKG7/GZMB/IFNG/CD3D/CD8A/CTSW/CD2/CD244/TBX21
GSE7509_UNSTIM_VS_FCGRIIB_STIM_DC_DN	GSE7509_UNSTIM_VS_FCGRIIB_STIM_DC_DN	11	0.598686	2.0523	0.0110906	0.214204	0.184482	15	tags=82%, list=41%, signal=69%	CCL5/GZMA/PRF1/GZMB/IFNG/CD3D/CD8A/CTSW/IL18RAP
GO_CELL_ACTIVATION	GO_CELL_ACTIVATION	14	0.542005	1.92513	0.0162455	0.214204	0.184482	22	tags=93%, list=59%, signal=61%	CCL5/PRF1/IFNG/CD3D/SLA2/CD8A/ZNF683/CD2/CD7/CD244/TBX21/CD3E/LCK
GO_LEUKOCYTE_ACTIVATION	GO_LEUKOCYTE_ACTIVATION	14	0.542005	1.92513	0.0162455	0.214204	0.184482	22	tags=93%, list=59%, signal=61%	CCL5/PRF1/IFNG/CD3D/SLA2/CD8A/ZNF683/CD2/CD7/CD244/TBX21/CD3E/LCK
GO_LYMPHOCYTE_ACTIVATION	GO_LYMPHOCYTE_ACTIVATION	13	0.511081	1.84628	0.0188356	0.214204	0.184482	22	tags=92%, list=59%, signal=58%	PRF1/IFNG/CD3D/SLA2/CD8A/ZNF683/CD2/CD7/CD244/TBX21/CD3E/LCK
GSE26495_NAIVE_VS_PD1LOW_CD8_TCELL_DN	GSE26495_NAIVE_VS_PD1LOW_CD8_TCELL_DN	13	0.489681	1.76898	0.0239726	0.214204	0.184482	6	tags=46%, list=16%, signal=60%	CCL5/GZMH/GZMA/PRF1/NKG7/GZMB
BOYLAN_MULTIPLE_MYELOMA_C_D_DN	BOYLAN_MULTIPLE_MYELOMA_C_D_DN	11	0.492834	1.68944	0.0277264	0.214204	0.184482	21	tags=91%, list=57%, signal=56%	CCL5/GZMA/NKG7/CXCR6/CD3D/CTSW/IL18RAP/CD7/TBX21/CD3E
GSE26495_NAIVE_VS_PD1HIGH_CD8_TCELL_DN	GSE26495_NAIVE_VS_PD1HIGH_CD8_TCELL_DN	10	0.53092	1.77227	0.0290381	0.214204	0.184482	5	tags=50%, list=14%, signal=59%	CCL5/GZMH/GZMA/PRF1/NKG7
MATSUDA_NATURAL_KILLER_DIFFERENTIATION	MATSUDA_NATURAL_KILLER_DIFFERENTIATION	12	0.52	1.85423	0.0292096	0.214204	0.184482	24	tags=100%, list=65%, signal=52%	CCL5/PRF1/NKG7/GZMB/IFNG/CXCR6/CD7/CD247/CD244/TBX21/PDCD1/FASLG
GSE45739_UNSTIM_VS_ACD3_ACD28_STIM_WT_CD4_TCELL_DN	GSE45739_UNSTIM_VS_ACD3_ACD28_STIM_WT_CD4_TCELL_DN	15	0.489149	1.78257	0.0329861	0.215753	0.185816	7	tags=47%, list=19%, signal=64%	CCL5/GZMH/GZMA/PRF1/NKG7/GZMB/IFNG
GO_POSITIVE_REGULATION_OF_IMMUNE_SYSTEM_PROCESS	GO_POSITIVE_REGULATION_OF_IMMUNE_SYSTEM_PROCESS	13	0.46866	1.69304	0.0359589	0.215753	0.185816	23	tags=92%, list=62%, signal=54%	CCL5/IFNG/CD3D/SIRPG/SLA2/CD2/CD247/CD244/TBX21/CD3E/LCK/PDCD1
GNF2_IL2RB	GNF2_IL2RB	12	0.444779	1.58601	0.04811	0.236328	0.203536	20	tags=83%, list=54%, signal=57%	GZMH/GZMA/PRF1/NKG7/CTSW/IL18RAP/CD7/CD247/CD244/TBX21
GO_CELL_DEATH	GO_CELL_DEATH	10	0.481481	1.60723	0.0508167	0.236328	0.203536	24	tags=100%, list=65%, signal=48%	GZMH/GZMA/PRF1/GZMB/IFNG/CD2/CD3E/LCK/PDCD1/FASLG
GSE45739_UNSTIM_VS_ACD3_ACD28_STIM_NRAS_KO_CD4_TCELL_DN	GSE45739_UNSTIM_VS_ACD3_ACD28_STIM_NRAS_KO_CD4_TCELL_DN	14	0.451482	1.60361	0.0523466	0.236328	0.203536	6	tags=43%, list=16%, signal=58%	CCL5/GZMH/GZMA/PRF1/NKG7/GZMB
GO_IMMUNE_SYSTEM_PROCESS	GO_IMMUNE_SYSTEM_PROCESS	29	0.521174	1.56721	0.0568807	0.236328	0.203536	24	tags=76%, list=65%, signal=123%	CCL5/GZMH/GZMA/PRF1/GZMB/IFNG/CD3D/SIRPG/SLA2/CD8A/CTSW/ZNF683/IL18RAP/CD2/CD7/CD247/CD244/TBX21/CD3E/LCK/PDCD1/FASLG
JAATINEN_HEMATOPOIETIC_STEM_CELL_DN	JAATINEN_HEMATOPOIETIC_STEM_CELL_DN	15	0.432234	1.57516	0.0572917	0.236328	0.203536	18	tags=73%, list=49%, signal=63%	CCL5/GZMH/GZMA/PRF1/NKG7/GZMB/CD3D/CD8A/IL18RAP/CD2/CD247
GO_LEUKOCYTE_CELL_CELL_ADHESION	GO_LEUKOCYTE_CELL_CELL_ADHESION	11	0.453351	1.55409	0.064695	0.237215	0.2043	22	tags=91%, list=59%, signal=52%	CCL5/IFNG/CD3D/SLA2/CD8A/CD2/CD7/TBX21/CD3E/LCK
GO_SINGLE_ORGANISM_CELL_ADHESION	GO_SINGLE_ORGANISM_CELL_ADHESION	11	0.453351	1.55409	0.064695	0.237215	0.2043	22	tags=91%, list=59%, signal=52%	CCL5/IFNG/CD3D/SLA2/CD8A/CD2/CD7/TBX21/CD3E/LCK
GO_POSITIVE_REGULATION_OF_CELL_ACTIVATION	GO_POSITIVE_REGULATION_OF_CELL_ACTIVATION	12	0.440821	1.57189	0.0687285	0.238741	0.205614	23	tags=92%, list=62%, signal=51%	CCL5/IFNG/CD3D/SIRPG/CD2/CD247/CD244/TBX21/CD3E/LCK/PDCD1
